# Supplementary material for: Fabrication of fluorescent SiO2@zeolitic imidazolate framework-8 nanosensor for Cu2+ detection
Source: Royal Society of Chemistry journal article supplement (doi:10.1039/c4an01773k), 2014-11-19
Supplement: c4an01773k1.pdf [file c4an01773k1.pdf]

# **Fabrication of fluorescent SiO<sub>2</sub>@ zeolitic imidazolate framework-8 nanosensor for Cu<sup>2+</sup> detection**

Yonghai Song, Dongqin Hu, Fenfen Liu, Shouhui Chen and Li Wang,\*

*Key Laboratory of Functional Small organic molecule, Ministry of Education,  
College of Chemistry and Chemical Engineering, Jiangxi Normal University,  
Nanchang 330022, People's Republic of China*

---

\* Corresponding author: Tel/Fax: +86 791 88120861. E-mail: lwanggroup@aliyun.com (L. Wang).

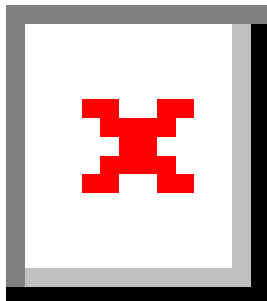

**Fig. S1** SEM image of ZIF-8

ZIF-8 nanocrystals were prepared for comparison. Typically, DMF solution of  $\text{Zn}(\text{NO}_3)_2 \cdot 6\text{H}_2\text{O}$  (50 mM, 4 mL) and 2-methylimidazole (50 mM, 4 mL) were mixed and stirred in a 50 mL three-necked bottle for 2 h in an oil bath (150 °C). The ZIF-8 nanocrystals were obtained by centrifugation at 10000 rpm for 10 min and washed with ethanol for three times. Finally, the ZIF-8 nanocrystals were dried in vacuum at 60 °C.

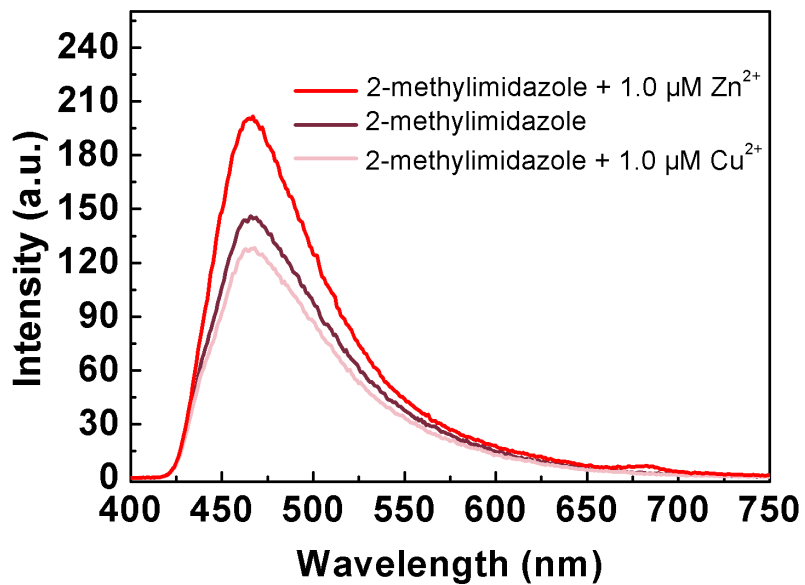

**Fig. S2** Fluorescence emission spectra of 2-methylimidazole in the presence of 1.0 μM Zn<sup>2+</sup> (red), 2-methylimidazole (brown) and 2-methylimidazole in the presence of 1.0 μM Cu<sup>2+</sup> (pink).

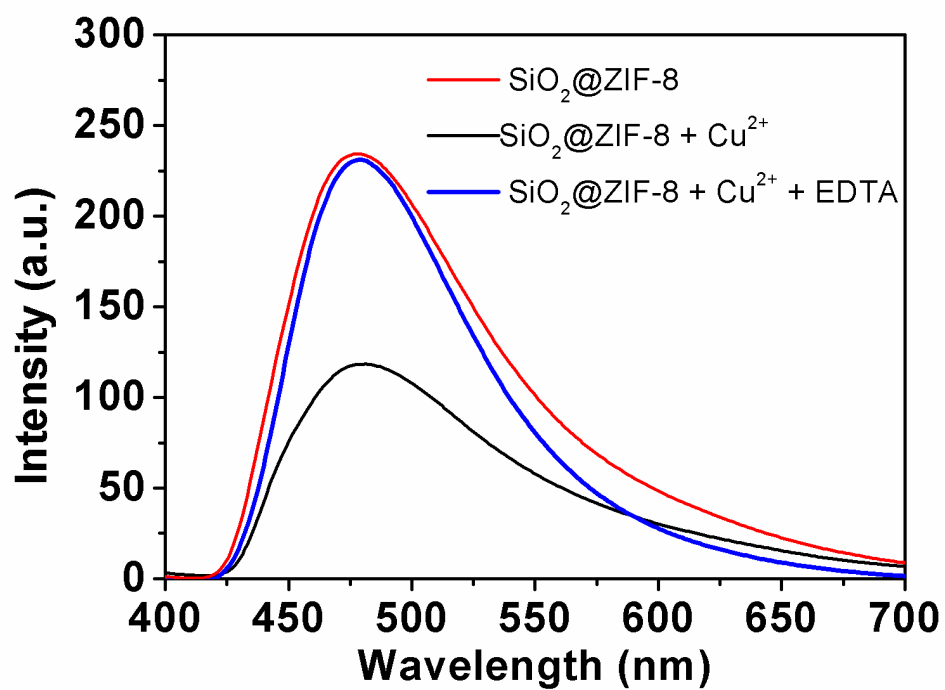

**Fig. S3** Fluorescence emission spectra of ZIF-8 (red), ZIF-8 in the presence of Cu<sup>2+</sup> (black) and ZIF-8 in the presence of Cu<sup>2+</sup> and EDTA (blue).

**Table S1. Detection of Cu<sup>2+</sup> in Yao Lake water samples.**

| <b>Sample</b>  | <b>Spiked Cu<sup>2+</sup> (nM)</b> | <b>Detected Cu<sup>2+</sup> (nM)</b> | <b>Recovery (%)</b> |
|----------------|------------------------------------|--------------------------------------|---------------------|
| Water sample 1 | 0                                  | Not detected                         | -----               |
| Water sample 2 | 50                                 | 51.36 ± 0.05                         | 100.71              |
| Water sample 3 | 100                                | 103.54 ± 0.02                        | 103.54              |
| Water sample 4 | 300                                | 307.65 ± 0.08                        | 102.55              |
